# Supplementary figures and images for: Chrysin Ameliorates Cyclosporine-A-Induced Renal Fibrosis by Inhibiting TGF-β1-Induced Epithelial–Mesenchymal Transition
Source: MDPI journal article supplement (doi:10.3390/ijms221910252), 2021-09-23

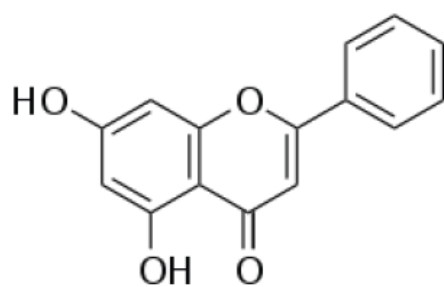

Chrysin

**Figure S1.** Structure of chrysin

Supplement: s1 [file s1]
